# Supplementary material for: Improved prediction of sudden cardiac death in patients with heart failure through digital processing of electrocardiography
Source: PubMed Central journal article supplement — Europace. 2023 Jan 4;25(3):922–30. doi: 10.1093/europace/euac261 (PMC10062335; doi:10.1093/europace/euac261), 2023-01-04
Supplement: euac261_supplementary_data.pdf [file euac261_supplementary_data.pdf]

# Improved prediction of sudden cardiac death in patients with heart failure through digital processing of electrocardiography

## Supplementary Appendix

### Authors:

Yasuyuki Shiraishi,<sup>1\*</sup> Shinichi Goto,<sup>2\*</sup> Nozomi Niimi,<sup>1</sup> Yoshinori Katsumata,<sup>3</sup>  
Ayumi Goda,<sup>4</sup> Makoto Takei,<sup>5</sup> Mike Saji,<sup>6</sup> Motoaki Sano,<sup>1</sup> Keiichi Fukuda,<sup>1</sup>  
Takashi Kohno,<sup>4</sup> Tsutomu Yoshikawa,<sup>6</sup> and Shun Kohsaka<sup>1</sup>

\* These authors contributed equally to this work

### Affiliations:

<sup>1</sup>Department of Cardiology, Keio University School of Medicine, Tokyo, Japan

<sup>2</sup>One Brave Idea and Division of Cardiovascular Medicine, Department of Medicine, Brigham and Women's Hospital, Boston, MA, USA

<sup>3</sup>Institute for Integrated Sports Medicine, Keio University School of Medicine, Tokyo, Japan

<sup>4</sup>Department of Cardiovascular Medicine, Kyorin University School of Medicine, Tokyo, Japan

<sup>5</sup>Department of Cardiology, Saiseikai Central Hospital, Tokyo, Japan

<sup>6</sup>Department of Cardiology, Sakakibara Heart Institute, Tokyo, Japan

## Table of Contents

**Table S1.** Sensitivity analyses of the discriminative ability of the ECG-AI index, and the frequency of SCD and non-SCD by LVEF categories.

Abbreviations: ECG-AI: Electrocardiography-based artificial intelligence, ROC-AUC: Receiver operating characteristic area under the curve, SCD: Sudden cardiac death, LVEF: Left ventricular ejection fraction, CI: Confidence interval.

**Table S2.** Subdistributional HRs of the ECG-AI index for predicting SCD events.

Subdistributional HRs are derived from the Fine-Gray models, accounting for the competing risk of non-SCD.

Abbreviations: HR: Hazard ratio, CI: Confidence interval, ECG-AI: Electrocardiogram-based artificial intelligence, SCD: Sudden cardiac death, ICD: Implantable cardioverter-defibrillator, LVEF: Left ventricular ejection fraction, NYHA: New York Heart Association.

**Table S3.** Patient backgrounds according to age ( $\leq 75$  years vs.  $> 75$  years), sex (men vs. women), and etiology (ischemic vs. non-ischemic).

Abbreviations: LVEF: Left ventricular ejection fraction, NYHA: New York Heart Association, HF: Heart failure, COPD: Chronic obstructive pulmonary disease, eGFR: Estimated glomerular filtration rate, BNP: B-type natriuretic peptide, NT-proBNP: N-terminal pro-B-type natriuretic peptide, ACEi: Angiotensin-converting enzyme inhibitor, ARB: Angiotensin receptor blocker, MRA: Mineralocorticoid receptor antagonist, ICD: Implantable cardioverter-defibrillator, CRT: Cardiac resynchronization therapy.

**Figure S1.** Patient allocation flow chart.

Abbreviations: WET-HF: West Tokyo Heart Failure, ECG: Electrocardiogram.

**Figure S2.** Architecture of the neural network model.

Abbreviations: ECG: Electrocardiogram, 1D: One-dimensional, LSTM: Long short-term memory, SCD: Sudden cardiac death.

**Figure S3.** Schematic illustration of the process of training and testing the neural network model.

The model was trained with data from the derivation cohort, and the performance of each model was calculated using data from the validation dataset at the end of each epoch. The final model was chosen as the model that performed best for 50 epochs in the validation cohort. The performance of the final model was calculated only once using data from the testing dataset.

**Figure S4.** Visualization of the region of interest that our final neural network model interpreted based on Grad-CAM results.

**Figure S5.** Forest plots of subdistributional HRs and 95% CI of the ECG-AI index for SCD by each subgroup.

**Figure S6.** Cumulative incidence of SCDs and non-SCDs according to estimated risk by the ECG-AI models.

The cutoffs of SCD risk were defined by the Youden index of the logistic regression model for predicting 3-year SCD: (a) ECG-AI index, and (b) ECG-AI combined model with LVEF and NYHA class.

Abbreviations: SCD: Sudden cardiac death, ECG-AI: Electrocardiogram-based artificial intelligence, LVEF: Left ventricular ejection fraction, NYHA: New York Heart Association.

**Figure S7.** Time-dependent ROC-AUC for predicting 3-year SCD events in the Cox proportional hazards models.

Abbreviations: ROC: Receiver operating characteristic area under the curve, SCD: Sudden cardiac death.

**Table S1.** Sensitivity analyses of the discriminative ability of the ECG-AI index and frequency of SCD and non-SCD by LVEF categories

| LVEF category           | Frequency       |                 |                     | ECG-AI index performance |           |
|-------------------------|-----------------|-----------------|---------------------|--------------------------|-----------|
|                         | Patient, number | SCD, number (%) | Non-SCD, number (%) | ROC-AUC                  | 95% CI    |
| <b>LVEF cutoff: 45%</b> |                 |                 |                     |                          |           |
| ≤ 35%                   | 291             | 25 (8.6)        | 49 (16.8)           | 0.53                     | 0.40–0.66 |
| 35%–45%                 | 215             | 13 (6.0)        | 51 (23.7)           | 0.61                     | 0.40–0.81 |
| ≥ 45%                   | 571             | 21 (3.7)        | 124 (21.7)          | 0.63                     | 0.50–0.76 |
| <b>LVEF cutoff: 50%</b> |                 |                 |                     |                          |           |
| ≤ 35%                   | 291             | 25 (8.6)        | 49 (16.8)           | 0.53                     | 0.40–0.66 |
| 35%–50%                 | 329             | 21 (6.4)        | 73 (22.2)           | 0.69                     | 0.55–0.83 |
| ≥ 50%                   | 457             | 13 (2.8)        | 102 (22.3)          | 0.53                     | 0.38–0.69 |
| <b>LVEF cutoff: 55%</b> |                 |                 |                     |                          |           |
| ≤ 35%                   | 291             | 25 (8.6)        | 49 (16.8)           | 0.53                     | 0.40–0.66 |
| 35%–55%                 | 436             | 26 (6.0)        | 100 (22.9)          | 0.65                     | 0.52–0.78 |
| ≥ 55%                   | 350             | 8 (2.3)         | 75 (21.4)           | 0.51                     | 0.34–0.68 |
| <b>LVEF cutoff: 60%</b> |                 |                 |                     |                          |           |
| ≤ 35%                   | 291             | 25 (8.6)        | 49 (16.8)           | 0.53                     | 0.40–0.66 |
| 35%–60%                 | 572             | 31 (5.4)        | 129 (22.6)          | 0.66                     | 0.55–0.77 |
| ≥ 60%                   | 214             | 3 (1.4)         | 46 (21.5)           | 0.58                     | 0.38–0.77 |

Abbreviations: ECG-AI: Electrocardiography-based artificial intelligence, ROC-AUC: Receiver operating characteristic area under the curve, SCD: Sudden cardiac death, LVEF: Left ventricular ejection fraction, CI: Confidence interval.

**Table S2.** Subdistributional HRs of the ECG-AI index for predicting SCD events

| Characteristic                  | Univariable |           |         | Multivariable |           |         |
|---------------------------------|-------------|-----------|---------|---------------|-----------|---------|
|                                 | sHR         | 95% CI    | P-value | sHR           | 95% CI    | P-value |
| <b>Indication for ICD</b>       |             |           |         |               |           |         |
| LVEF $\leq$ 35% and NYHA II–III | 2.25        | 1.30–3.89 | 0.004   | 1.98          | 1.11–3.54 | 0.020   |
| <b>ECG-AI index</b>             |             |           |         |               |           |         |
| Z-score (standardized)          | 1.31        | 1.12–1.53 | 0.001   | 1.23          | 1.04–1.49 | 0.015   |

Subdistributional HRs are derived from the Fine-Gray models, accounting for the competing risk of non-SCD.

Abbreviations: HR: Hazard ratio, CI: Confidence interval, ECG-AI: Electrocardiogram-based artificial intelligence, SCD: Sudden cardiac death, ICD: Implantable cardioverter-defibrillator, LVEF: Left ventricular ejection fraction, NYHA: New York Heart Association.

**Table S3.** Patient backgrounds according to age ( $\leq 75$  years vs.  $> 75$  years), sex (men vs. women), and etiology (ischemic vs. non-ischemic)

| Value                            | $\leq 75$ years old<br>n = 473 | $> 75$ years old<br>n = 604 | Men<br>n = 638   | Women<br>n = 439   | Ischemic<br>n = 305 | Non-ischemic<br>n = 772 |
|----------------------------------|--------------------------------|-----------------------------|------------------|--------------------|---------------------|-------------------------|
| Age, years                       | 65 (56–70)                     | 83 (79–87) *                | 75 (63–82)       | 80 (72–85) *       | 77 (68–83)          | 77 (66–84)              |
| Men, n (%)                       | 328 (69.3)                     | 310 (51.3) *                | 638 (100)        | 0 (0)              | 212 (69.5)          | 426 (55.2) *            |
| BMI, kg/m <sup>2</sup>           | 22.1 (19.4–24.9)               | 20.4 (17.9–22.8) *          | 21.4 (19.3–24.1) | 20.4 (17.8–23.1) * | 21.3 (19.0–23.7)    | 21.0 (18.6–23.9)        |
| SBP, mm Hg                       | 110 (98–125)                   | 116 (102–128) *             | 112 (100–128)    | 113 (101–126)      | 116 (100–130)       | 112 (100–126)           |
| Heart rate, bpm                  | 72 (62–80)                     | 70 (60–78)                  | 70 (60–80)       | 70 (61–80)         | 70 (60–79)          | 70 (61–80)              |
| LVEF, %                          | 43 (31–57)                     | 50 (38–60) *                | 44 (31–57)       | 52 (40–61) *       | 41 (31–50)          | 50 (36–60) *            |
| LVEF $\leq 35\%$ , n (%)         | 166 (35.1)                     | 125 (20.7) *                | 216 (33.9)       | 75 (17.1) *        | 106 (34.8)          | 185 (24.0) *            |
| NYHA class II–III, n (%)         | 425 (89.9)                     | 565 (93.5)                  | 575 (90.1)       | 415 (94.5)         | 284 (93.1)          | 706 (91.5)              |
| Ischemic etiology, n (%)         | 130 (27.5)                     | 175 (29.0)                  | 212 (33.2)       | 93 (21.2) *        | 305 (100)           | 0 (0)                   |
| HF hospitalization, n (%)        | 88 (18.8)                      | 150 (25.4)                  | 139 (22.2)       | 99 (22.9)          | 79 (26.3)           | 159 (21.0)              |
| Atrial fibrillation, n (%)       | 155 (32.8)                     | 273 (45.2) *                | 244 (38.2)       | 184 (41.9)         | 73 (23.9)           | 355 (46.0) *            |
| Hypertension, n (%)              | 314 (66.4)                     | 452 (74.8)                  | 466 (73.0)       | 300 (68.3)         | 234 (76.7)          | 532 (68.9)              |
| Diabetes mellitus, n (%)         | 204 (43.1)                     | 224 (37.1)                  | 283 (44.4)       | 145 (33.0) *       | 171 (56.1)          | 257 (33.3) *            |
| Stroke, n (%)                    | 51 (10.8)                      | 90 (14.9)                   | 89 (13.9)        | 52 (11.8)          | 55 (18.0)           | 86 (11.1)               |
| COPD, n (%)                      | 17 (3.6)                       | 48 (8.0)                    | 50 (7.8)         | 15 (3.4)           | 14 (4.6)            | 51 (6.6)                |
| Hemoglobin, g/dL                 | 12.7 (11.1–14.6)               | 11.4 (10.1–12.5) *          | 12.1 (10.8–14.0) | 11.5 (10.1–12.8) * | 11.6 (10.3–13.0)    | 12.0 (10.6–13.5)        |
| BUN, mg/L                        | 21.7 (16.4–31.3)               | 26.2 (18.7–37.5) *          | 24.8 (18.4–35.8) | 23.5 (16.6–34.6)   | 26.2 (19.2–36.5)    | 23.5 (17.2–35.1)        |
| eGFR, ml/min/1.73 m <sup>2</sup> | 56.4 (35.8–73.7)               | 44.7 (29.9–60.4) *          | 49.0 (30.6–64.9) | 49.7 (31.6–68.2)   | 41.6 (26.3–59.3)    | 51.9 (34.2–70.0) *      |
| Sodium, mEq/L                    | 139 (136–141)                  | 139 (136–141)               | 139 (136–141)    | 139 (137–141)      | 139 (136–141)       | 139 (137–141)           |
| Potassium, mEq/L                 | 4.4 (4.1–4.7)                  | 4.3 (4.0–4.6)               | 4.4 (4.1–4.7)    | 4.3(3.9–4.6)       | 4.4 (4.1–4.7)       | 4.3 (4.0–4.6)           |
| Uric acid, mg/L                  | 7.3 (5.7–8.5)                  | 7.1 (5.6–8.7)               | 7.4 (6.0–8.8)    | 6.6 (5.1–8.2) *    | 7.2 (5.8–8.3)       | 7.1 (5.7–8.7)           |
| Albumin, mg/L                    | 3.6 (3.2–3.9)                  | 3.3 (2.9–3.6) *             | 3.4 (3.1–3.8)    | 3.4 (3.0–3.7)      | 3.3 (3.0–3.7)       | 3.4 (3.1–3.7)           |
| BNP, pg/mL                       | 226 (103–466)                  | 256 (143–543)               | 254 (129–496)    | 236 (124–535)      | 285 (161–622)       | 230 (113–455)           |
| Loop diuretics, n (%)            | 340 (71.9)                     | 480 (79.6)                  | 492 (77.1)       | 328 (74.9)         | 242 (79.3)          | 578 (75.0)              |
| ACEi or ARB, n (%)               | 304 (64.3)                     | 382 (63.3)                  | 420 (65.8)       | 266 (60.7)         | 210 (68.9)          | 476 (61.7)              |

|                     |            |              |            |            |            |              |
|---------------------|------------|--------------|------------|------------|------------|--------------|
| Beta blocker, n (%) | 382 (80.8) | 432 (71.6) * | 490 (76.8) | 324 (74.0) | 258 (84.6) | 556 (72.1) * |
| MRA, n (%)          | 169 (35.9) | 205 (34.1)   | 217 (34.1) | 157 (36.0) | 107 (35.3) | 267 (34.7)   |
| Digitalis, n (%)    | 26 (5.5)   | 49 (8.1)     | 34 (5.3)   | 41 (9.4)   | 9 (3.0)    | 66 (8.6)     |
| Amiodarone, n (%)   | 52 (11.0)  | 61 (10.1)    | 80 (12.5)  | 33 (7.5)   | 28 (9.2)   | 85 (11.0)    |
| ICD, n (%)          | 17 (3.6)   | 15 (2.5)     | 24 (3.8)   | 8 (1.8)    | 9 (3.0)    | 23 (3.0)     |
| CRT, n (%)          | 7 (1.5)    | 6 (1.0)      | 11 (1.7)   | 2 (0.5)    | 5 (1.6)    | 8 (1.0)      |

\*  $p < 0.001$ .

Abbreviations: LVEF: Left ventricular ejection fraction, NYHA: New York Heart Association, HF: Heart failure, COPD: Chronic obstructive pulmonary disease, eGFR: Estimated glomerular filtration rate, BNP: B-type natriuretic peptide, NT-proBNP: N-terminal pro-B-type natriuretic peptide, ACEi: Angiotensin-converting enzyme inhibitor, ARB: Angiotensin receptor blocker, MRA: Mineralocorticoid receptor antagonist, ICD: Implantable cardioverter-defibrillator, CRT: Cardiac resynchronization therapy.

**Figure S1.** Patient allocation flow chart

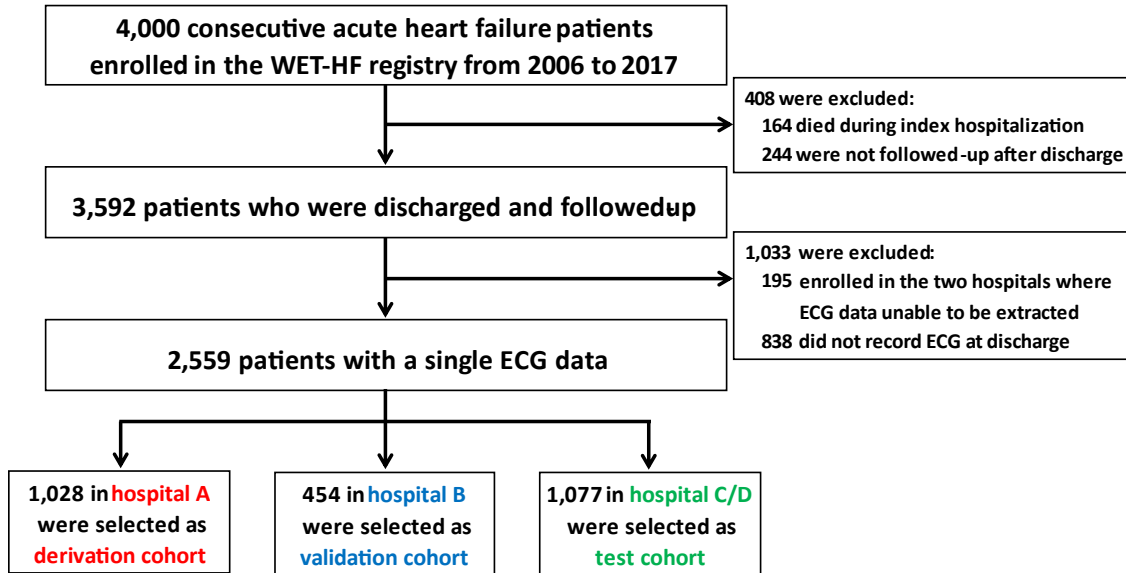

Abbreviations: WET-HF: West Tokyo Heart Failure, ECG: Electrocardiogram.



**Figure S2.** Architecture of the neural network model

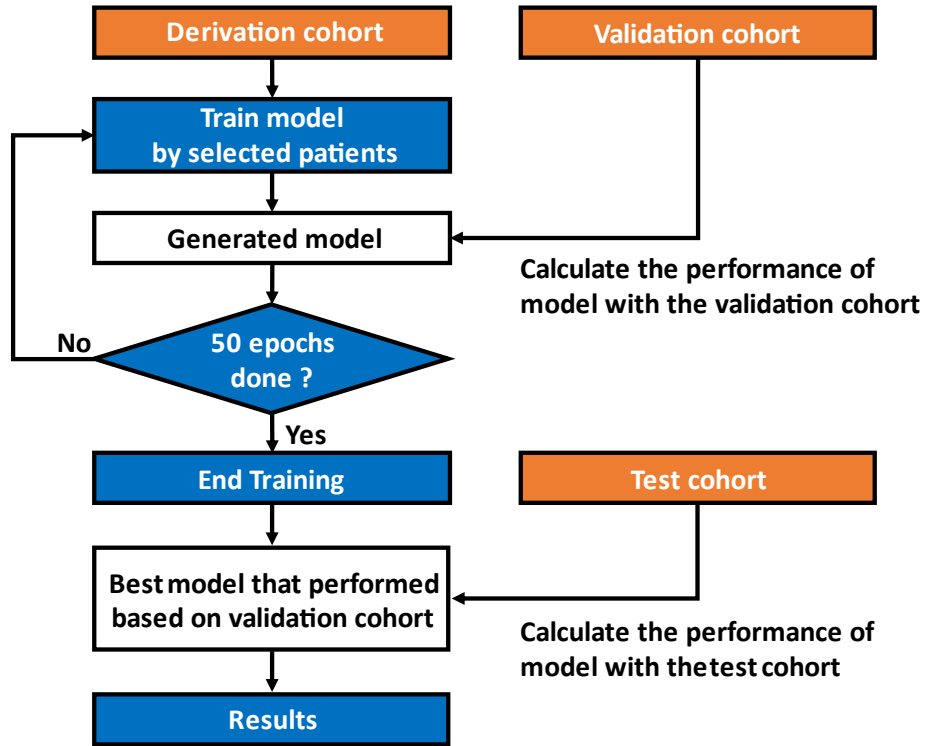

Abbreviations: ECG: Electrocardiogram, 1D: One-dimensional, LSTM: Long short-term memory, SCD: Sudden cardiac death.

**Figure S3.** Schematic illustration of the process of training and testing the neural network model

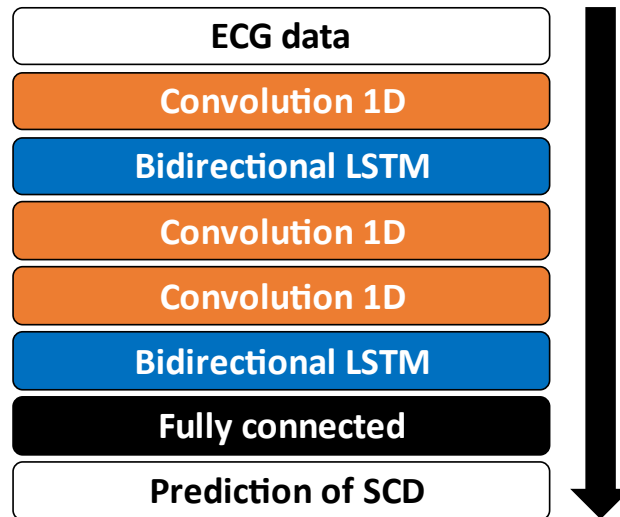

The model was trained with data from the derivation cohort, and the performance of each model was calculated using data from the validation dataset at the end of each epoch. The final model was chosen as the model that performed best for 50 epochs in the validation cohort. The performance of the final model was calculated only once using data from the testing dataset.

**Figure S4.** Visualization of the region of interest that our final neural network model interpreted based on Grad-CAM results.

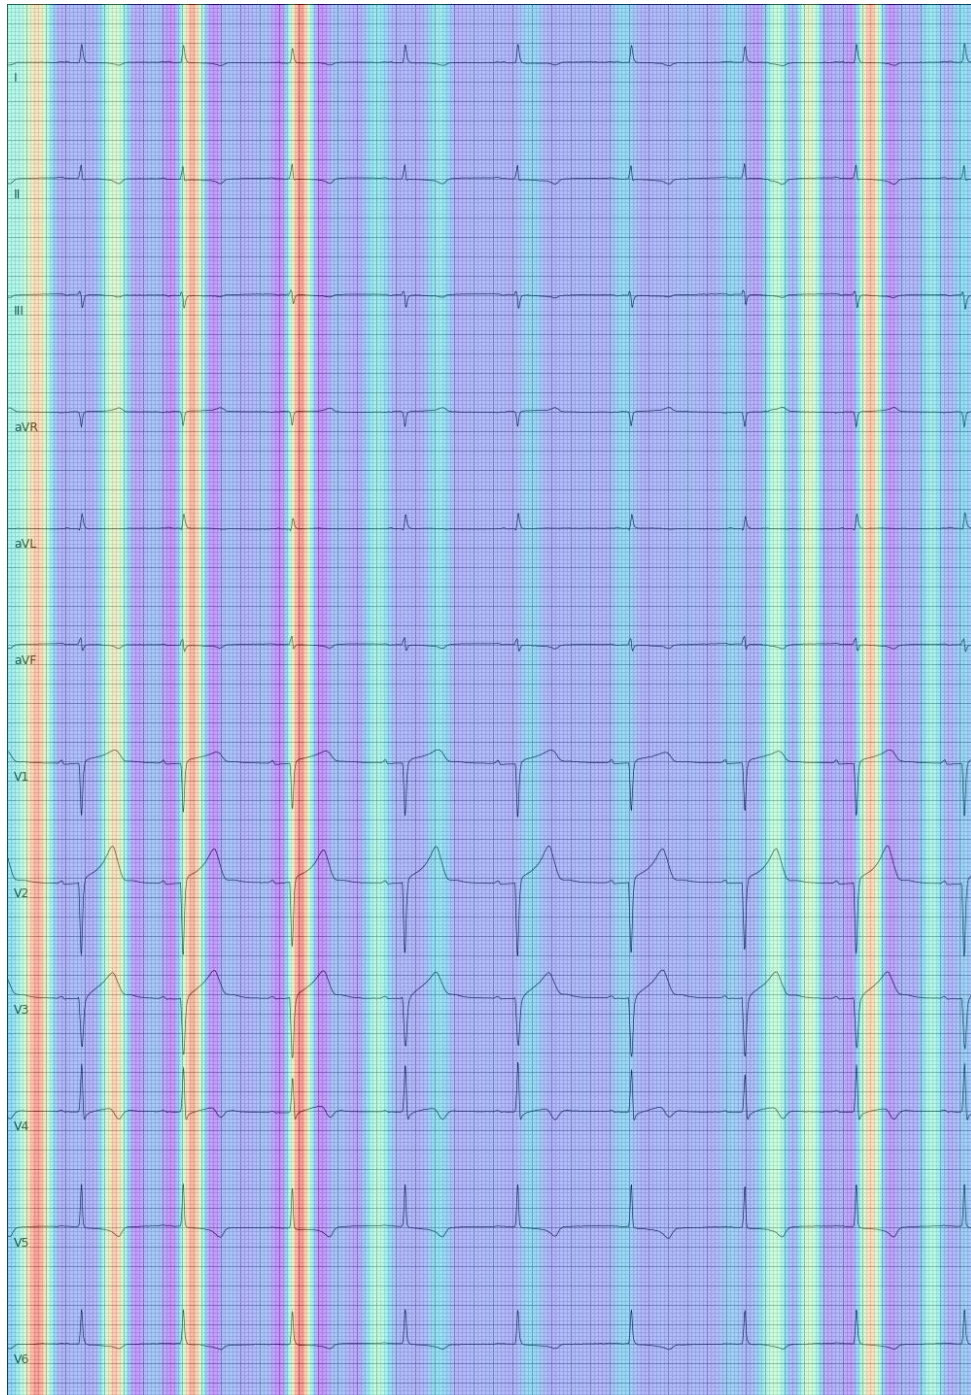

**Figure S5.** Forest plots of subdistributional HRs and 95% CI of the ECG-AI index for SCD by each subgroup

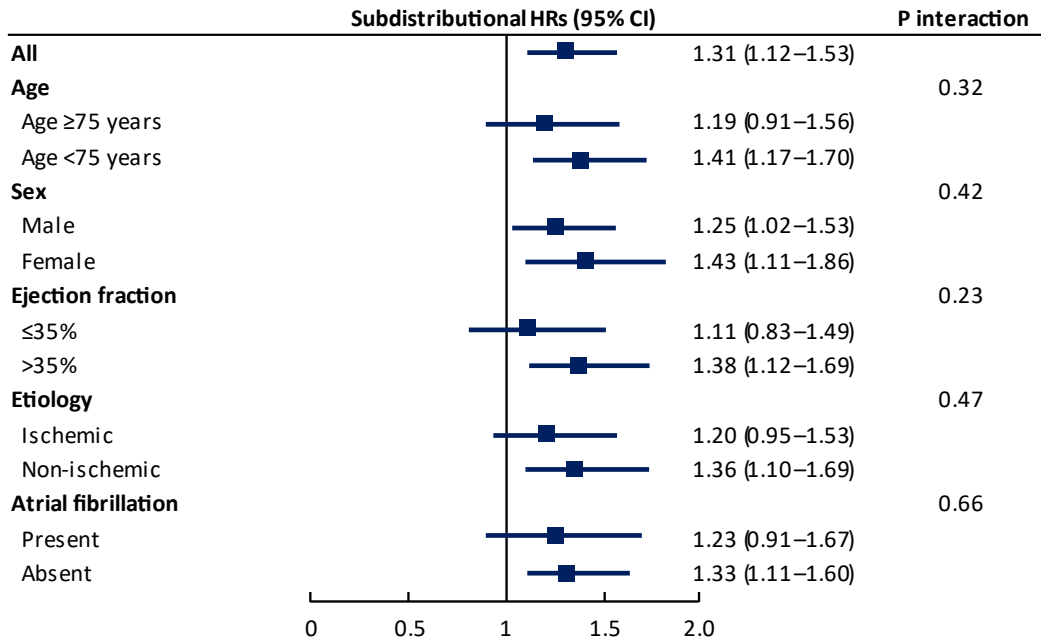

Abbreviations: HR: Hazard ratio, CI: Confidence interval, ECG-AI: Electrocardiogram-based artificial intelligence.

**Figure S6.** Cumulative incidence of SCDs and non-SCDs according to estimated risk by the ECG-AI models

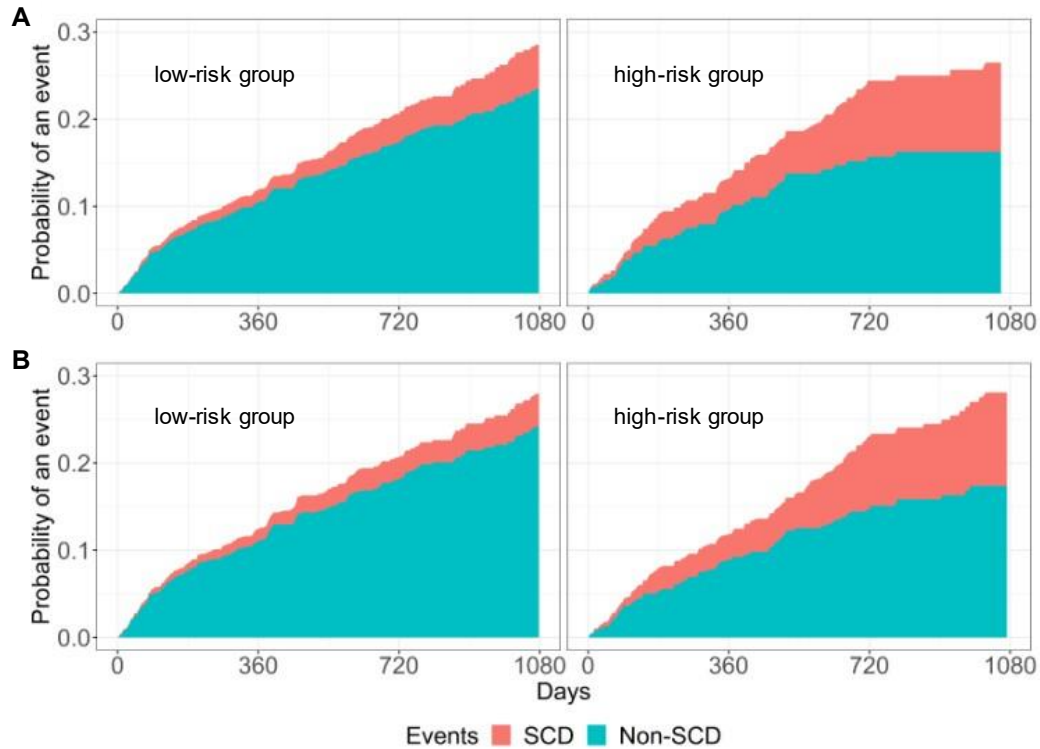

The cutoffs of SCD risk were defined by the Youden index of the logistic regression model for predicting 3-year SCD: (a) ECG-AI index, and (b) ECG-AI combined model with LVEF and NYHA class.

Abbreviations: SCD: Sudden cardiac death, ECG-AI: Electrocardiogram-based artificial intelligence, LVEF: Left ventricular ejection fraction, NYHA: New York Heart Association.

**Figure S7.** Time-dependent ROC-AUC for predicting 3-year SCD events in the Cox Proportional Hazards models

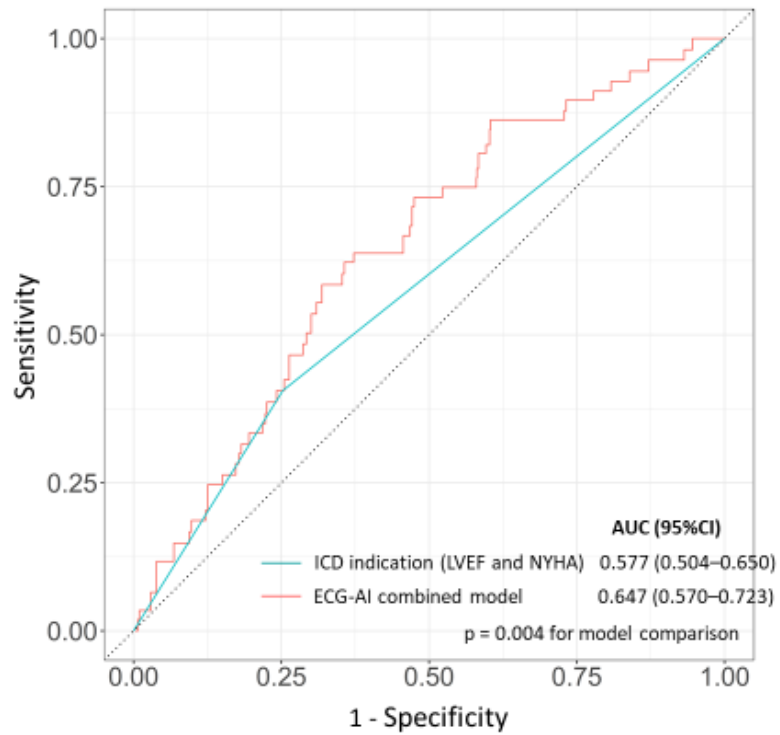

Abbreviations: ROC-AUC: Receiver operating characteristic area under the curve, SCD: Sudden cardiac death.
